# Supplementary material
Source: PubMed Central journal article supplement (PMC6751560)
Supplement: NIHMS1048434-supplement-Supplemental.pdf [file NIHMS1048434-supplement-Supplemental.pdf]

**Appendix**  
**Use of Time and Energy on Exercise, Prolonged TV Viewing, and Work Days**  
**Matthews et al.**

**Appendix Figure 1.** iDATA CONSORT diagram.

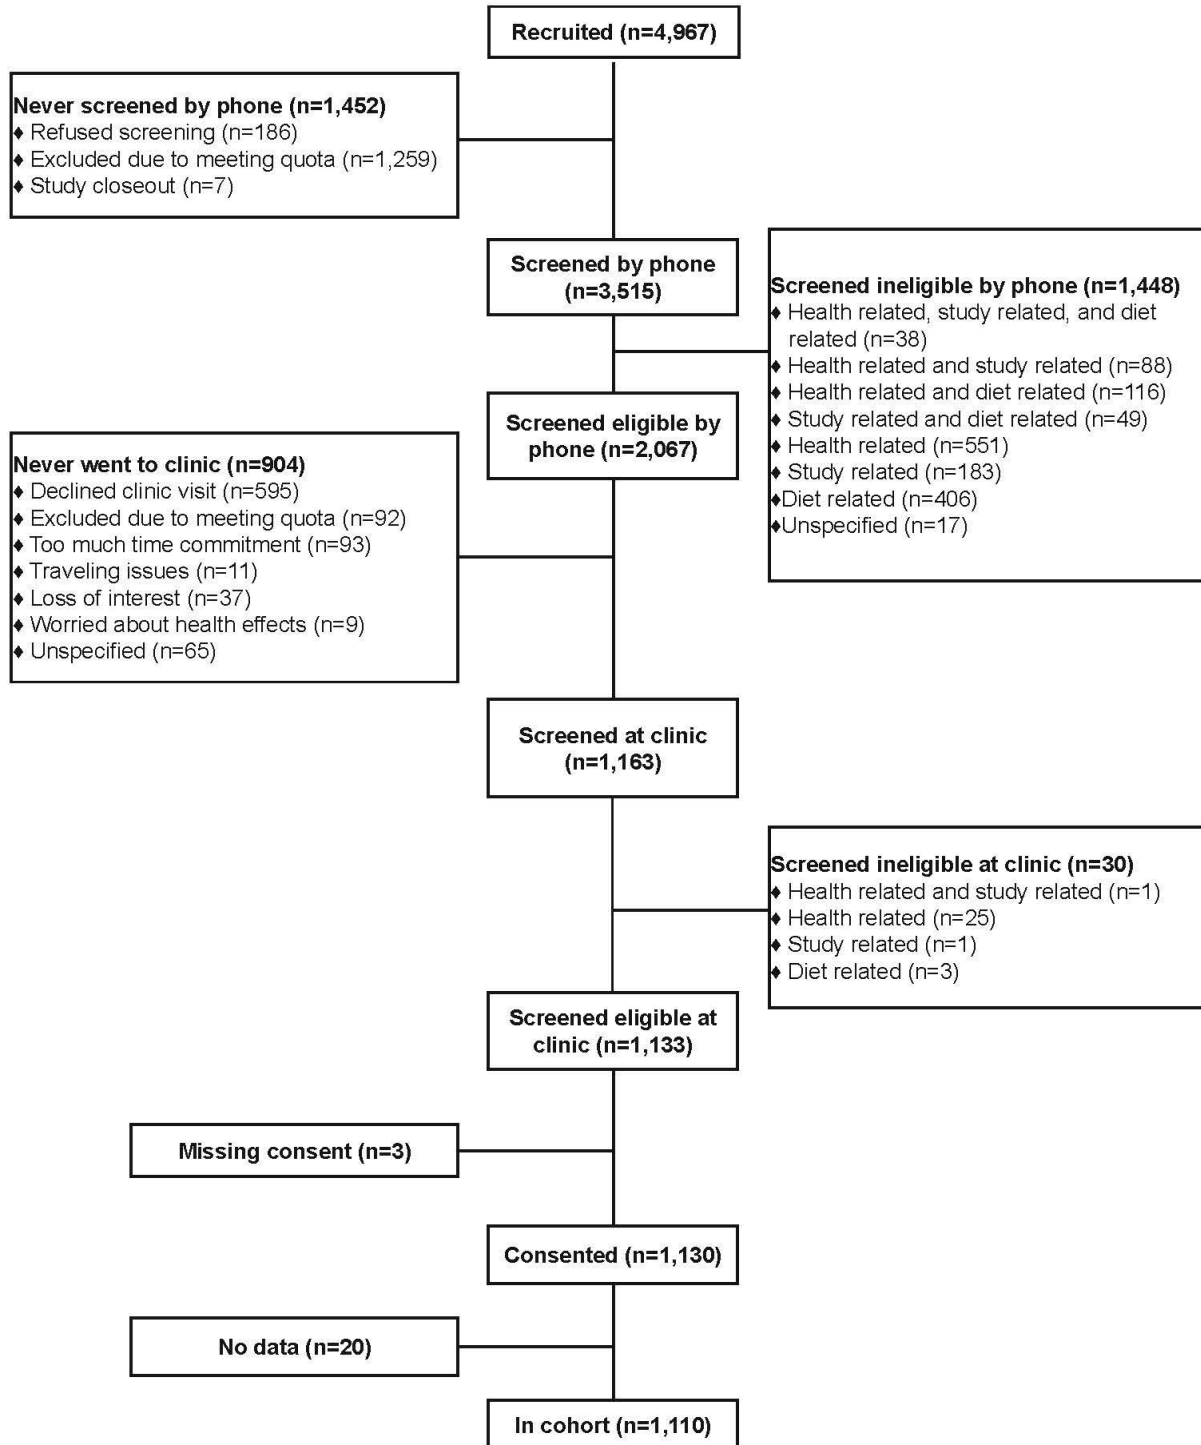

iDATA, Interactive Diet and Activity Tracking in AARP

**Appendix**  
**Use of Time and Energy on Exercise, Prolonged TV Viewing, and Work Days**  
**Matthews et al.**

**Appendix Table 1.** Measurement Schedule for Study Groups 1 and 3 and 2 and 4

| Group                           | Month |   |   |   |   |   |   |   |   |    |    |    |
|---------------------------------|-------|---|---|---|---|---|---|---|---|----|----|----|
|                                 | 1     | 2 | 3 | 4 | 5 | 6 | 7 | 8 | 9 | 10 | 11 | 12 |
| <b>Groups 1 and 3</b>           |       |   |   |   |   |   |   |   |   |    |    |    |
| Physical activity               |       |   |   |   |   |   |   |   |   |    |    |    |
| ActiGraph                       | X     |   |   |   |   | X |   |   |   |    |    |    |
| activPAL                        | X     |   |   |   |   | X |   |   |   |    |    |    |
| ACT24                           | X     |   | X |   | X |   | X |   | X |    | X  |    |
| Fitness Test                    | X     |   |   |   |   |   |   |   |   |    |    |    |
| Physical activity questionnaire |       |   | X |   |   |   |   |   | X |    |    |    |
| Biomarkers                      |       |   |   |   |   |   |   |   |   |    |    |    |
| Doubly labeled water            | X     |   |   |   |   | S |   |   |   |    |    |    |
| Anthropometry                   | X     |   |   |   |   | X |   |   |   |    |    | X  |
| <b>Groups 2 and 4</b>           |       |   |   |   |   |   |   |   |   |    |    |    |
| Physical activity               |       |   |   |   |   |   |   |   |   |    |    |    |
| ActiGraph                       |       |   |   |   |   | X |   |   |   |    |    | X  |
| activPAL                        |       |   |   |   |   | X |   |   |   |    |    | X  |
| ACT24                           |       | X |   | X |   | X |   | X |   | X  |    | X  |
| Fitness Test                    |       |   |   |   |   | X |   |   |   |    |    |    |
| Physical activity questionnaire |       |   | X |   |   |   |   |   | X |    |    |    |
| Biomarkers                      |       |   |   |   |   |   |   |   |   |    |    |    |
| Doubly labeled water            |       |   |   |   |   | X |   |   |   |    |    | S  |
| Anthropometry                   | X     |   |   |   |   | X |   |   |   |    |    | X  |

S, substudy only; ACT24, Activities Completed over Time in 24 hours

**Appendix**  
**Use of Time and Energy on Exercise, Prolonged TV Viewing, and Work Days**  
**Matthews et al.**

**Appendix Figure 2.** Sedentary time (hours/day) by exercise, work, and prolonged TV status, by time-use category.

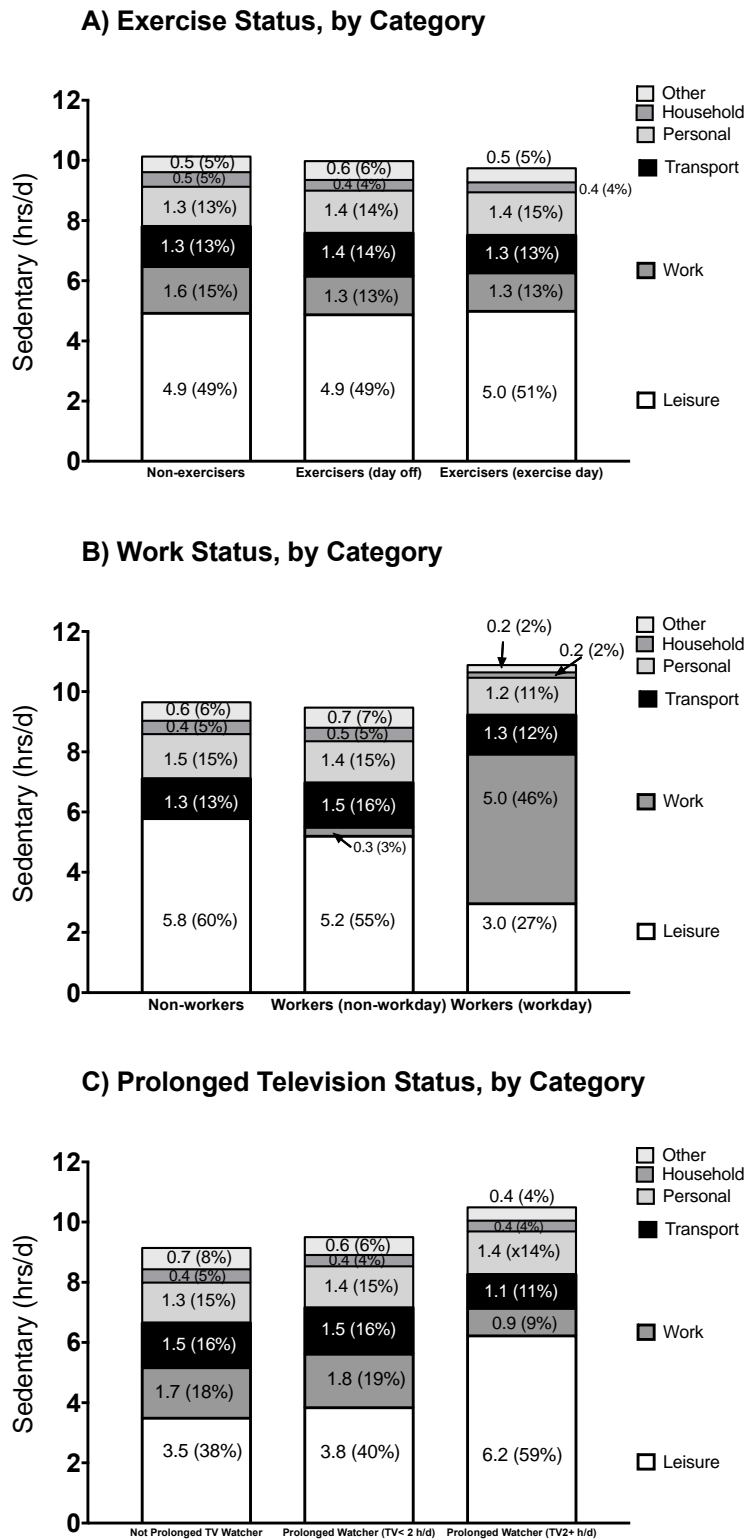

**Appendix**  
**Use of Time and Energy on Exercise, Prolonged TV Viewing, and Work Days**  
**Matthews et al.**

**Appendix Figure 3.** PAEE (MET-hours/day) by exercise, work, and prolonged TV status, by time-use category.

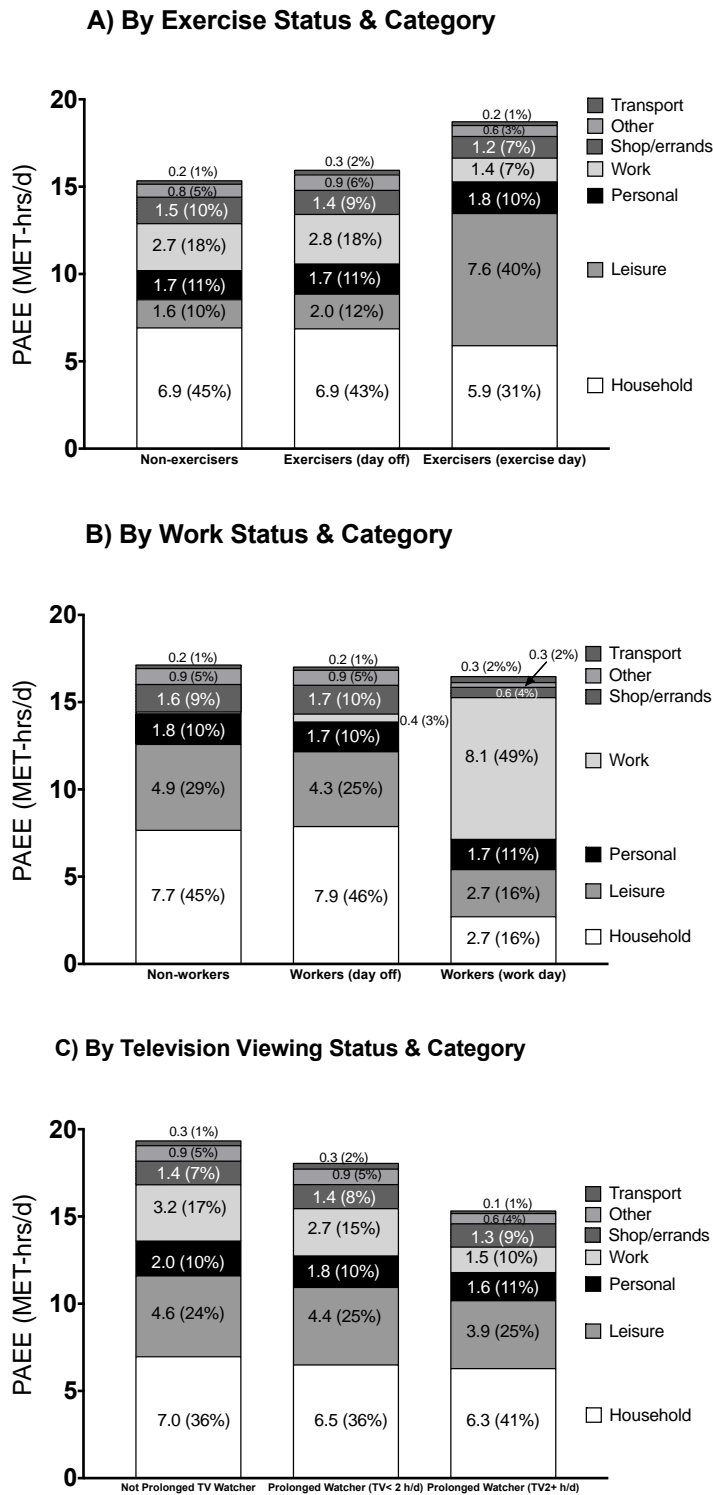

PAEE, physical activity energy expenditure

**Appendix**  
**Use of Time and Energy on Exercise, Prolonged TV Viewing, and Work Days**  
**Matthews et al.**

**Appendix Figure 4.** Mean time-use (hours/day) on days without and with exercise, and time differences by category<sup>a</sup> (hours/day) to increase exercise time.

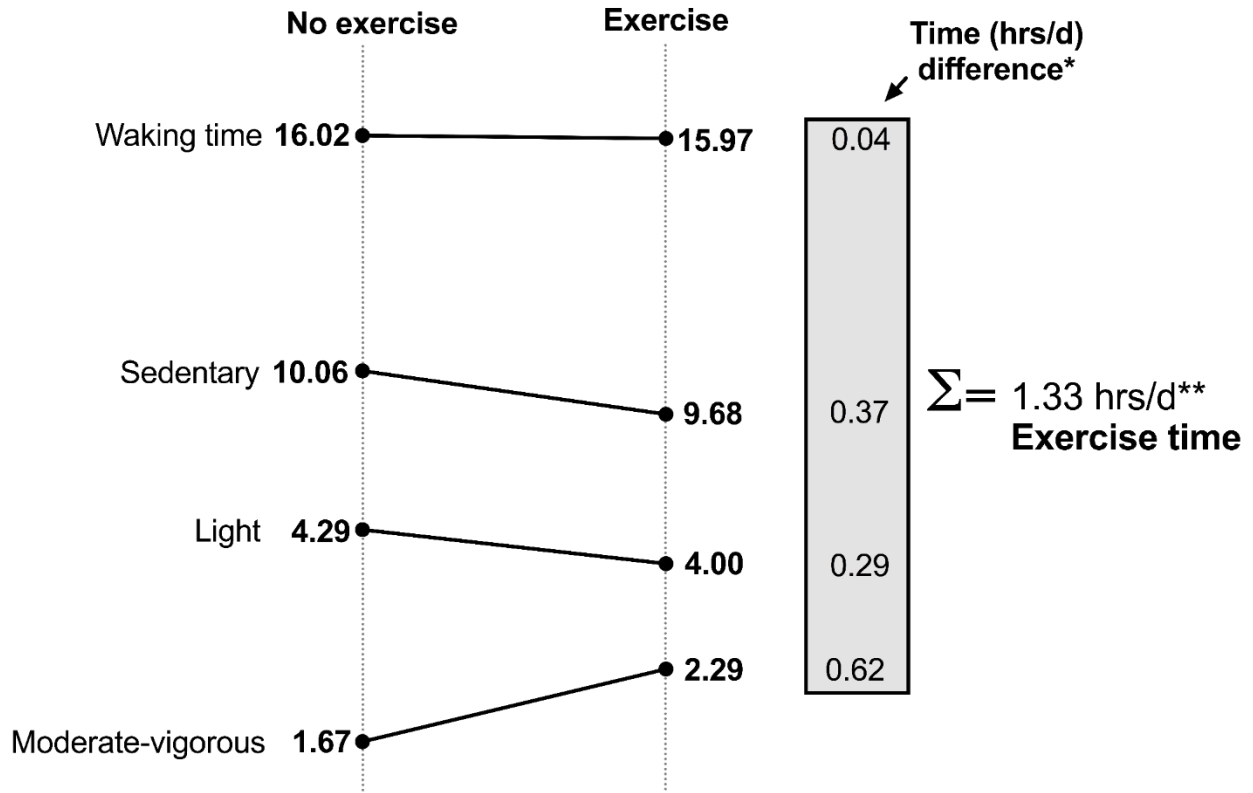

\*\* including rounding error of 0.01 hrs/d for waking time

<sup>a</sup>Time difference values (hours/day) are equal to regression coefficients (B) reported in Table 2

**Appendix**  
**Use of Time and Energy on Exercise, Prolonged TV Viewing, and Work Days**  
**Matthews et al.**

**Appendix Table 2.** Differences in Time-use (Hours/Day) and Energy Expenditure (MET-Hours/Day) by Day Time and Age, iDATA Study, 2012–2013

| Time-use outcomes                | Differences in outcome by type of day and age (year) |              |                   |              |                     |              |
|----------------------------------|------------------------------------------------------|--------------|-------------------|--------------|---------------------|--------------|
|                                  | Exercise (any)                                       |              | TV (2+ hours/day) |              | Work (4+ hours/day) |              |
|                                  | 50–64                                                | 65–74        | 50–64             | 65–74        | 50–64               | 65–74        |
| Sleep/in-bed time (hours/day)    | 0.10                                                 | –0.04        | –0.06             | –0.01        | <b>–0.94</b>        | <b>–0.73</b> |
| Total sedentary time (hours/day) | <b>–0.30</b>                                         | <b>–0.44</b> | <b>1.04</b>       | <b>0.65</b>  | <b>1.43</b>         | <b>0.87</b>  |
| Total active time (hours/day)    | 0.21                                                 | <b>0.48</b>  | <b>–0.96</b>      | <b>–0.63</b> | <b>–0.50</b>        | –0.11        |
| Light (hours/day)                | <b>–0.35</b>                                         | <b>–0.21</b> | <b>–0.44</b>      | <b>–0.45</b> | <b>–0.62</b>        | –0.29        |
| Moderate-vigorous (hours/day)    | <b>0.56</b>                                          | <b>0.68</b>  | <b>–0.57</b>      | <b>–0.20</b> | 0.14                | 0.14         |
| Total PAEE (MET-hours/day)       | <b>2.55</b>                                          | <b>3.17</b>  | <b>–3.08</b>      | <b>–1.63</b> | –0.80               | –0.10        |
| Exercise (hours/day)             | <b>1.27</b>                                          | <b>1.39</b>  | <b>–0.09</b>      | 0.00         | <b>–0.22</b>        | <b>–0.37</b> |
| Exercise (MET-hours/day)         | <b>5.92</b>                                          | <b>6.08</b>  | <b>–0.44</b>      | 0.06         | <b>–0.93</b>        | <b>–1.62</b> |
| TV (hours/day)                   | –0.13                                                | 0.10         | <b>2.90</b>       | <b>2.87</b>  | <b>–0.80</b>        | <b>–0.84</b> |

*Notes:* Mixed models: adjusted for age, sex, day of week, and season. Beta coefficients in bold,  $p < 0.05$ .

iDATA, Interactive Diet and Activity Tracking in AARP; PAEE, physical activity energy expenditure

**Appendix**  
**Use of Time and Energy on Exercise, Prolonged TV Viewing, and Work Days**  
**Matthews et al.**

**Appendix Table 3.** Differences in Time-use (Hours/Day) and Energy Expenditure (MET-Hours/Day) by Day Time and Obesity Status, iDATA Study, 2012–2013

| Time-use outcomes                | Differences in time-use (hours/day) by type of day |              |                   |              |                     |              |
|----------------------------------|----------------------------------------------------|--------------|-------------------|--------------|---------------------|--------------|
|                                  | Exercise (any)                                     |              | TV (2+ hours/day) |              | Work (4+ hours/day) |              |
|                                  | Not obese                                          | Obese        | Not obese         | Obese        | Not obese           | Obese        |
| Sleep/in-bed time (hours/day)    | 0.07                                               | -0.03        | -0.03             | -0.02        | <b>-0.93</b>        | <b>-0.87</b> |
| Total sedentary time (hours/day) | <b>-0.35</b>                                       | <b>-0.33</b> | <b>0.93</b>       | <b>0.70</b>  | <b>1.35</b>         | <b>1.21</b>  |
| Total active time (hours/day)    | <b>0.29</b>                                        | <b>0.37</b>  | <b>-0.88</b>      | <b>-0.68</b> | <b>-0.42</b>        | -0.35        |
| Light (hours/day)                | <b>-0.27</b>                                       | <b>-0.41</b> | <b>-0.48</b>      | <b>-0.37</b> | <b>-0.49</b>        | <b>-0.62</b> |
| Moderate-vigorous (hours/day)    | <b>0.55</b>                                        | <b>0.80</b>  | <b>-0.44</b>      | <b>-0.34</b> | 0.08                | 0.25         |
| Total PAEE (MET-hours/day)       | <b>2.67</b>                                        | <b>3.08</b>  | <b>-2.65</b>      | <b>-1.99</b> | -0.77               | -0.44        |
| Exercise (hours/day)             | <b>1.32</b>                                        | <b>1.36</b>  | -0.06             | 0.00         | <b>-0.27</b>        | <b>-0.29</b> |
| Exercise (MET-hours/day)         | <b>5.98</b>                                        | <b>6.07</b>  | -0.26             | -0.03        | <b>-1.19</b>        | <b>-1.16</b> |
| TV (hours/day)                   | -0.05                                              | 0.07         | <b>2.84</b>       | <b>3.01</b>  | <b>-0.81</b>        | <b>-0.80</b> |

*Notes:* Mixed models: adjusted for age, sex, day of week, and season. Beta coefficients in bold,  $p < 0.05$ . Not obese = BMI  $< 30$  kg/m<sup>2</sup>. Obese = BMI  $\geq 30$  kg/m<sup>2</sup>.
